# Supplementary material for: Structure and function of a novel GH8 endoglucanase from the bacterial cellulose synthase complex of Raoultella ornithinolytica
Source: PubMed Central journal article supplement (PMC5407803; doi:10.1371/journal.pone.0176550), 2017-04-27
Supplement: pone.0176550.s001.pdf [file pone.0176550.s001.pdf]

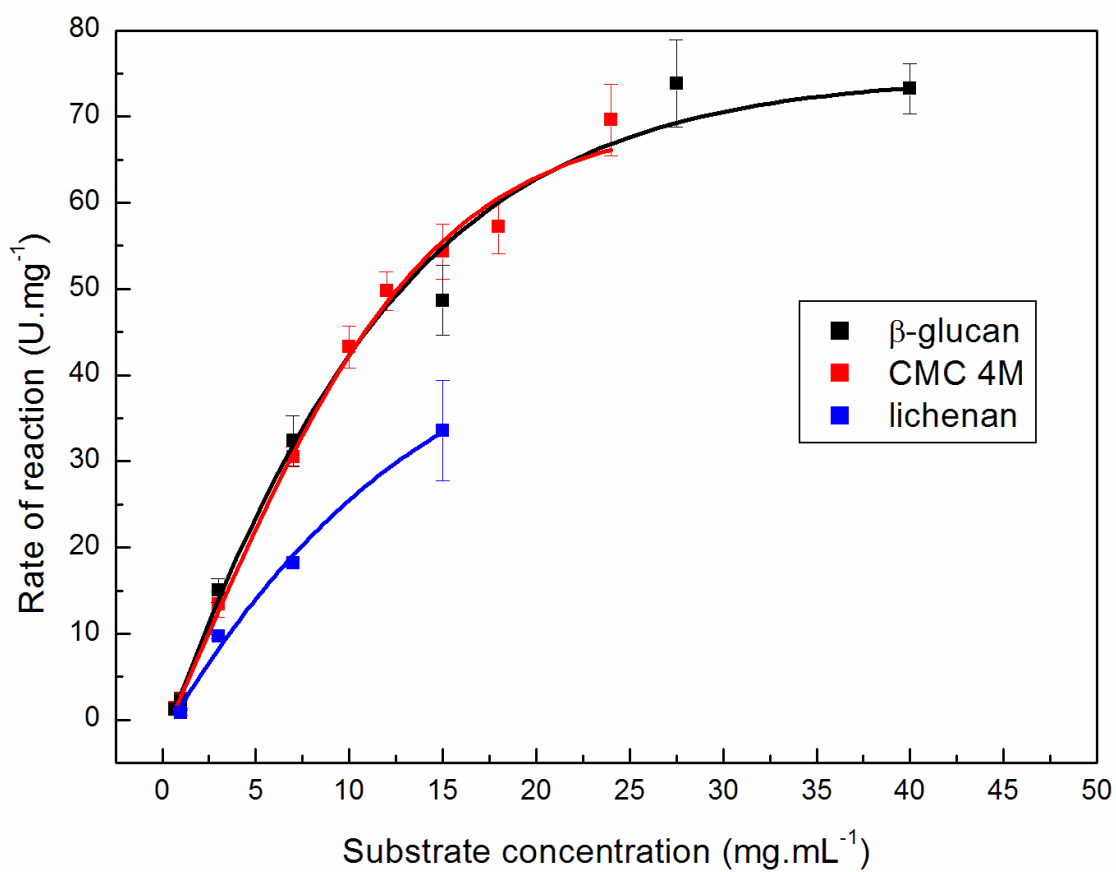

**S1 Fig: Kinetic curves for the reactions of AfmE1 against  $\beta$ -glucan, CMC 4M and lichenan.** The Michaelis-Menten parameters were determined from the saturation curve obtained using different  $\beta$ -glucan concentrations. In the kinetic analyses using CMC or lichenan as substrate, saturation was not achieved as the high viscosity interfered with the determination of activity at higher substrate concentrations.
